# Supplementary material for: Identification of a novel K311 ubiquitination site critical for androgen receptor transcriptional activity
Source: PubMed Central journal article supplement (PMC5389688; doi:10.1093/nar/gkw1162), 2016-11-28

Suppl Figure 1. Clustering of genes into the biological processes significantly altered by the K311 mutation of AR

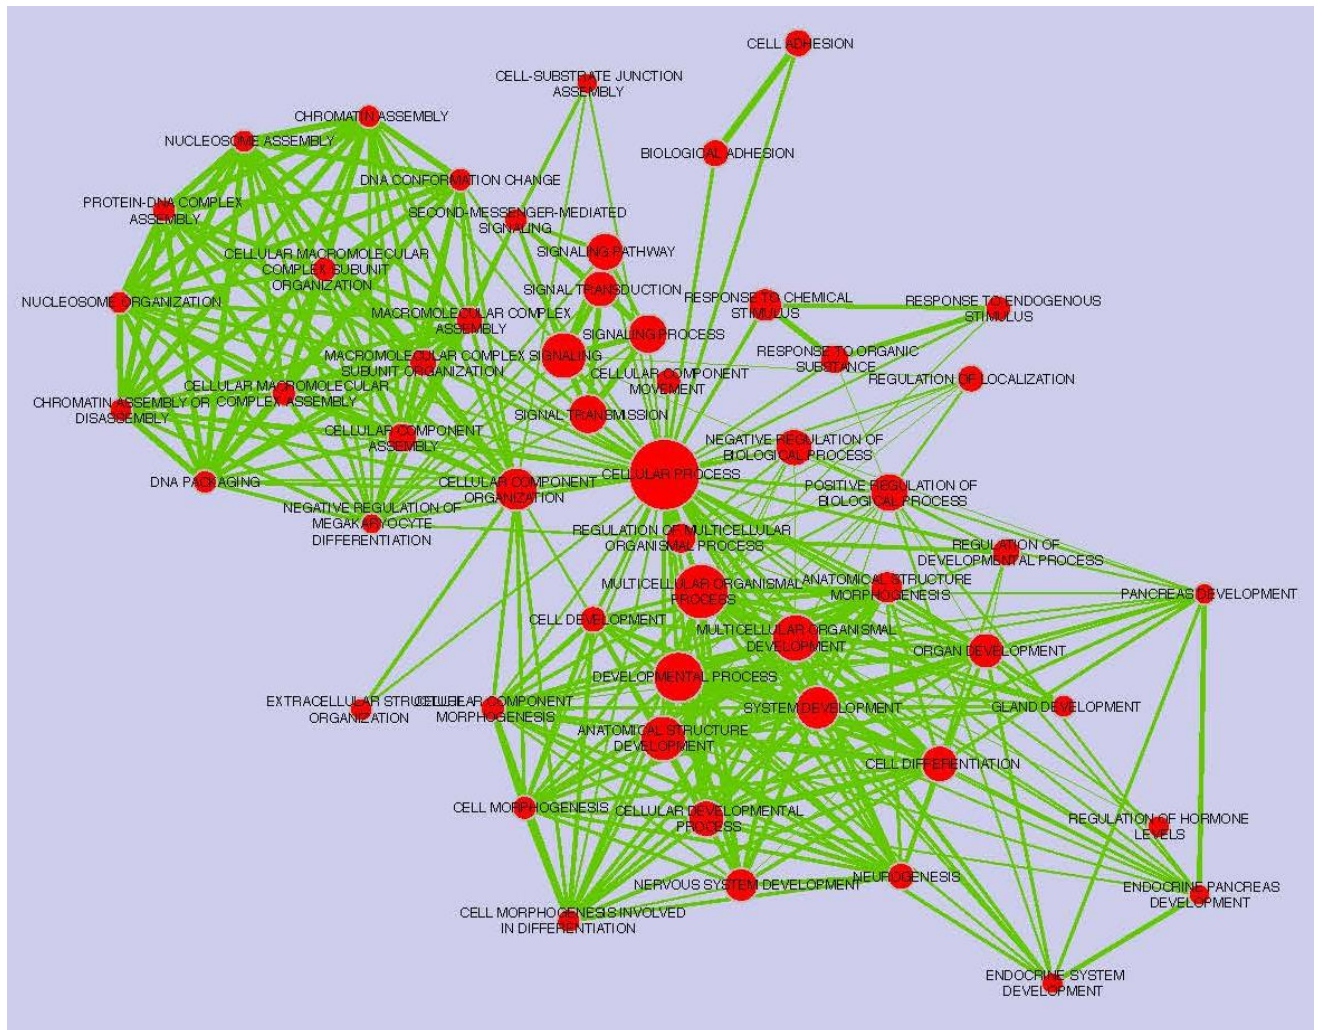

Suppl Figure 2. Clustered heat map of genes responsible for cell adhesion affected by K311 mutation

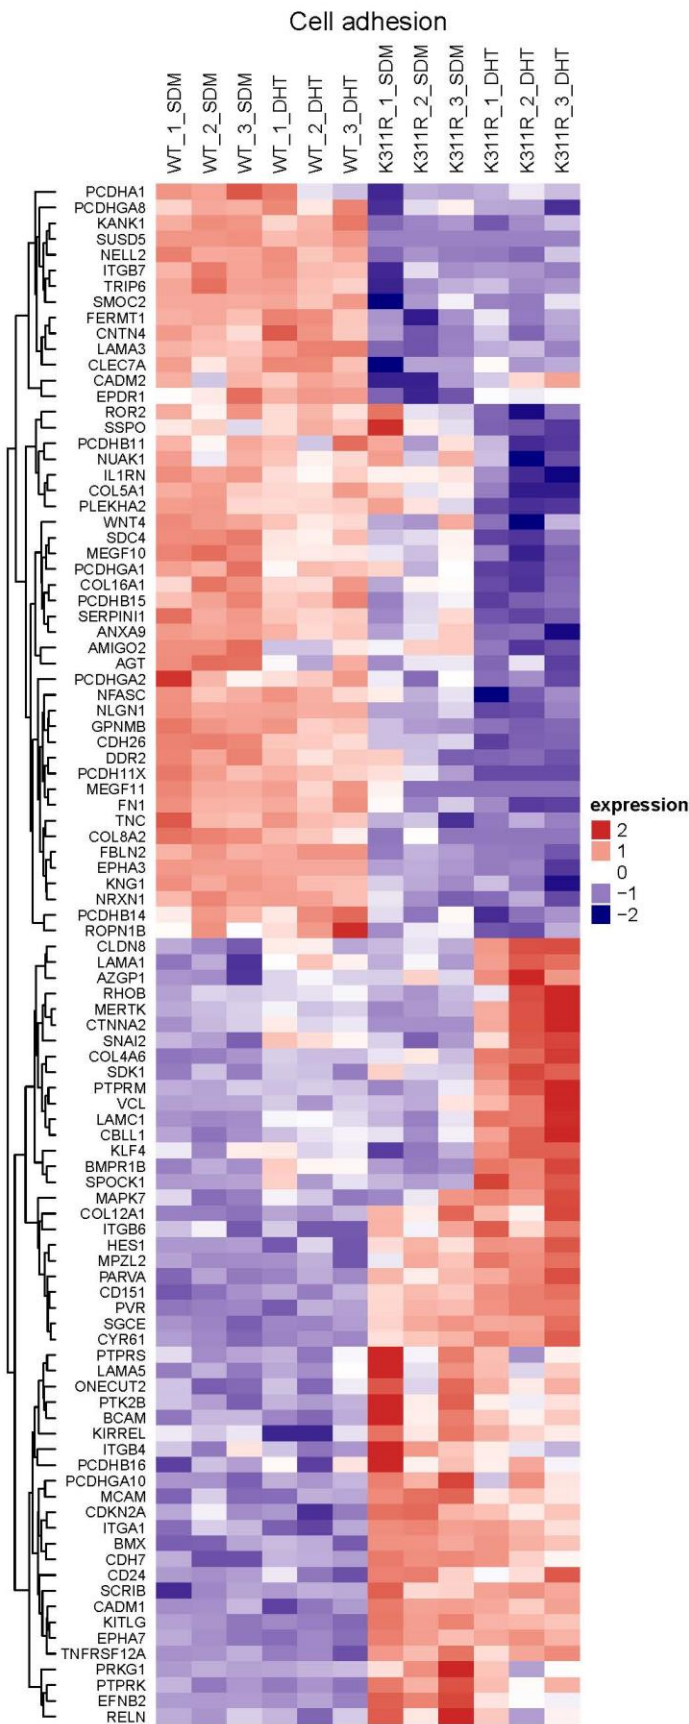

Suppl Figure 3. Clustered heat map of genes responsible for cell motility affected by K311 mutation

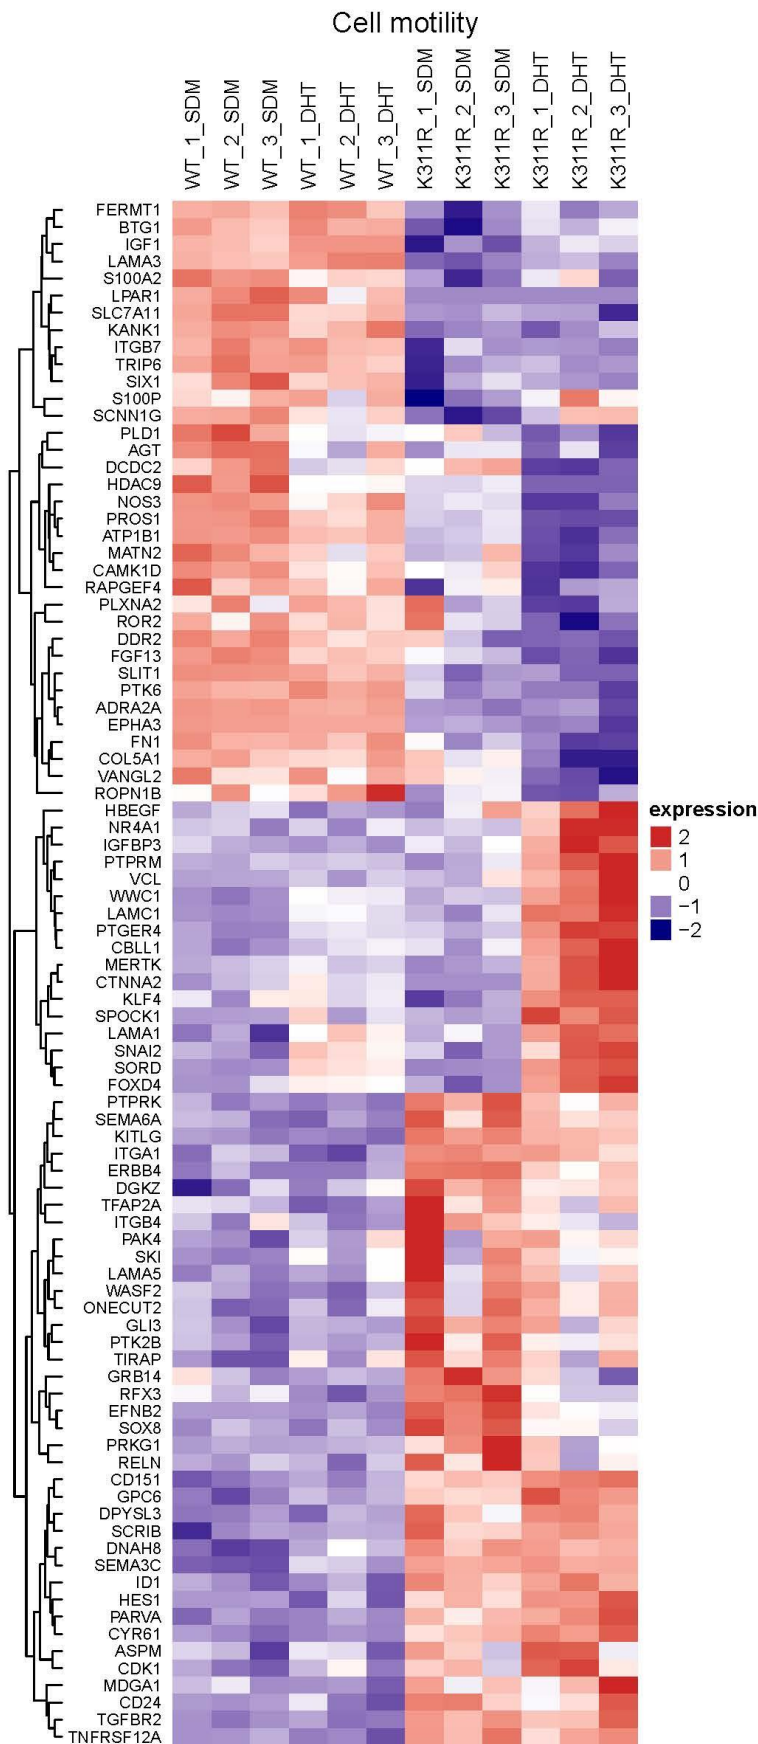

Suppl Figure 4. Clustered heat map of genes responsible for signal transduction affected by K311 mutation

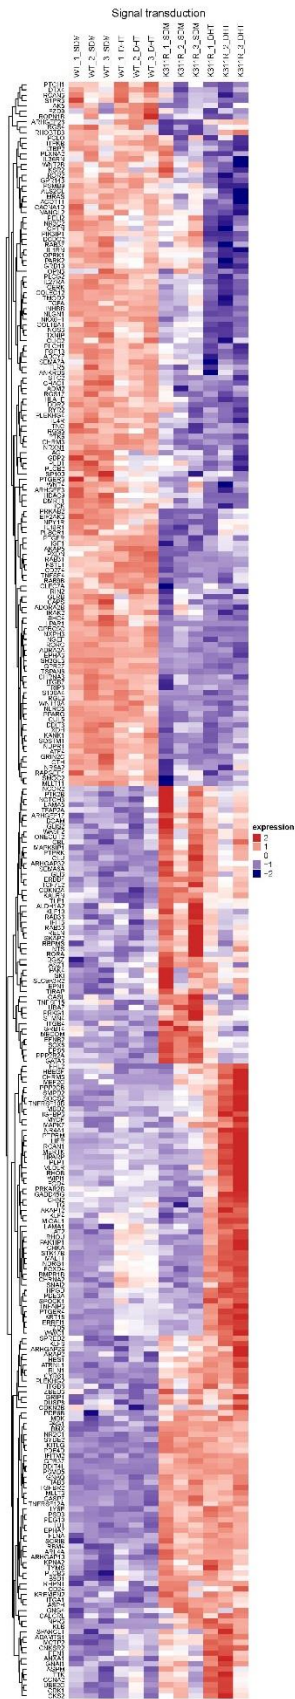



Suppl Figure 5. Clustered heat map of genes responsible for development affected by K311 mutation

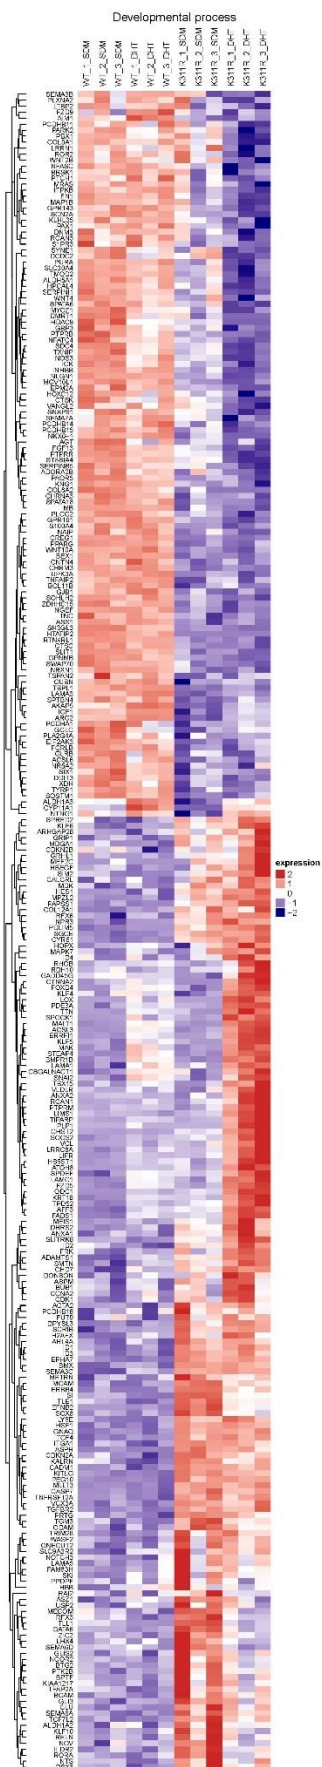

Supplement: gkw1162_Supp.pdf [file gkw1162_Supp.pdf]
